# Supplementary material for: Phagocytosis converts infiltrated monocytes to microglia-like phenotype in experimental brain ischemia
Source: Springer Nature journal article supplement (doi:10.1186/s12974-022-02552-5), 2022-07-18
Supplement: MOESM1 [file 23278554]

**Supplementary Table 1. GFP+ cell numbers in brain at 7d post-ischemia.**

| Cell type                                               | Cell Numbers (x 10 <sup>3</sup> ) |               |
|---------------------------------------------------------|-----------------------------------|---------------|
|                                                         | Contralateral                     | Ipsilateral   |
| Total splenocyte<br>[GFP+]                              | 4.19 ± 0.79                       | 83.13 ± 13.53 |
| Lymphocyte<br>[GFP+/CD11b-]                             | 1.73 ± 0.66                       | 12.16 ± 3.87  |
| MDM, NK cell, Neutrophil<br>[GFP+/CD11b+]               | 0.93 ± 0.32                       | 54.85 ± 7.29  |
| MDM<br>[GFP+/CD11b+/CD45+/NK1.1-/LY6G-]                 | 0.89 ± 0.31                       | 32.17 ± 6.29  |
| NK cell, Neutrophil<br>[GFP+/CD11b+/CD45+/NK1.1+/LY6G+] | 0.02 ± 0.01                       | 10.79 ± 2.66  |
