# Supplementary material for: Phagocytosis converts infiltrated monocytes to microglia-like phenotype in experimental brain ischemia
Source: Springer Nature journal article supplement (doi:10.1186/s12974-022-02552-5), 2022-07-18
Supplement: MOESM2 [file 23278554]

**Supplementary Table 2. Composition of immune cells in R3 and R4 region at 7d post-ischemia.**

|                                                           | Cell Numbers (x 10 <sup>3</sup> ) | (%) in R3 or R4 |
|-----------------------------------------------------------|-----------------------------------|-----------------|
| R3<br>[GFP-/CD11b+]                                       | 43.22 ± 8.68                      |                 |
| R3': MDM, microglia<br>[GFP-/CD11b+/CD45+/NK1.1-/LY6G-]   | 30.92 ± 7.13                      | 71.5            |
| NK cells, Neutrophils<br>[GFP-/CD11b+/CD45+/NK1.1+/LY6G+] | 3.13 ± 0.85                       | 7.2             |
| R4<br>[GFP+/CD11b+]                                       | 54.85 ± 7.29                      |                 |
| R4': MDM<br>[GFP+/CD11b+/CD45+/NK1.1-/LY6G-]              | 32.17 ± 6.29                      | 58.6            |
| NK cells, Neutrophils<br>[GFP+/CD11b+/CD45+/NK1.1+/LY6G+] | 10.79 ± 2.66                      | 19.7            |
